# Supplementary material for: A simplified immunoprecipitation method for quantitatively measuring antibody responses in clinical sera samples by using mammalian-produced Renillaluciferase-antigen fusion proteins
Source: Springer Nature journal article supplement (doi:10.1186/1472-6750-5-22), 2005-08-18
Supplement: Additional file 3 [file 1472-6750-5-22-s3.pdf]

**Additional File 3. Amount of protein (IgG) bound to A/G bead (mg/1ml) from different sera used in this study<sup>a</sup>**

| Controls             | Amount IgG ( $\mu\text{g}/1\mu\text{l}$ ) <sup>b</sup> |
|----------------------|--------------------------------------------------------|
| 1                    | 7.3                                                    |
| 2                    | 4.7                                                    |
| 3                    | 4.5                                                    |
| 4                    | 7.1                                                    |
| 5                    | 4.7                                                    |
| 6                    | 5.7                                                    |
| 7                    | 5.6                                                    |
| 8                    | 6.0                                                    |
| 9                    | 4.3                                                    |
| 10                   | 5.3                                                    |
| Head and Neck Cancer |                                                        |
| 11                   | 4.7                                                    |
| 12                   | 2.9                                                    |
| 13                   | 3.7                                                    |
| 14                   | 2.0                                                    |
| 15                   | 6.4                                                    |
| 16                   | 5.0                                                    |
| 17                   | 3.5                                                    |
| 18                   | 2.5                                                    |
| 19                   | 4.1                                                    |
| 20                   | 2.1                                                    |
| Breast Cancer        |                                                        |
| 21                   | 5.2                                                    |
| 22                   | 4.4                                                    |
| 23                   | 4.0                                                    |
| 24                   | 3.6                                                    |
| 25                   | 5.4                                                    |
| 26                   | 3.8                                                    |
| 27                   | 5.2                                                    |
| 28                   | 4.3                                                    |
| 29                   | 4.2                                                    |
| 30                   | 4.6                                                    |
| Colon                |                                                        |
| 31                   | 3.9                                                    |
| 32                   | 3.7                                                    |
| 33                   | 2.7                                                    |
| 34                   | 3.3                                                    |
| 35                   | 2.9                                                    |
| 36                   | 2.7                                                    |

<sup>a</sup>Sera (2 ml), protein A/G beads and buffer were mixed together, incubated for 60 minutes and the beads washed as described for performing the immunoprecipitation. Bound protein was eluted with 0.1 M glycine, pH 2.3. The amount of protein in the eluant was measured using the BCA Protein Assay kit (Pierce Biotechnology Inc.).

<sup>b</sup>Values are from a single determination.
